# Supplementary material for: A Water-Soluble Hydrogen Sulfide Donor Suppresses the Growth of Hepatocellular Carcinoma via Inhibiting the AKT/GSK-3β/β-Catenin and TGF-β/Smad2/3 Signaling Pathways
Source: Hindawi journal article supplement (doi:10.1155/2023/8456852), 2023-03-07

**Figure S1**

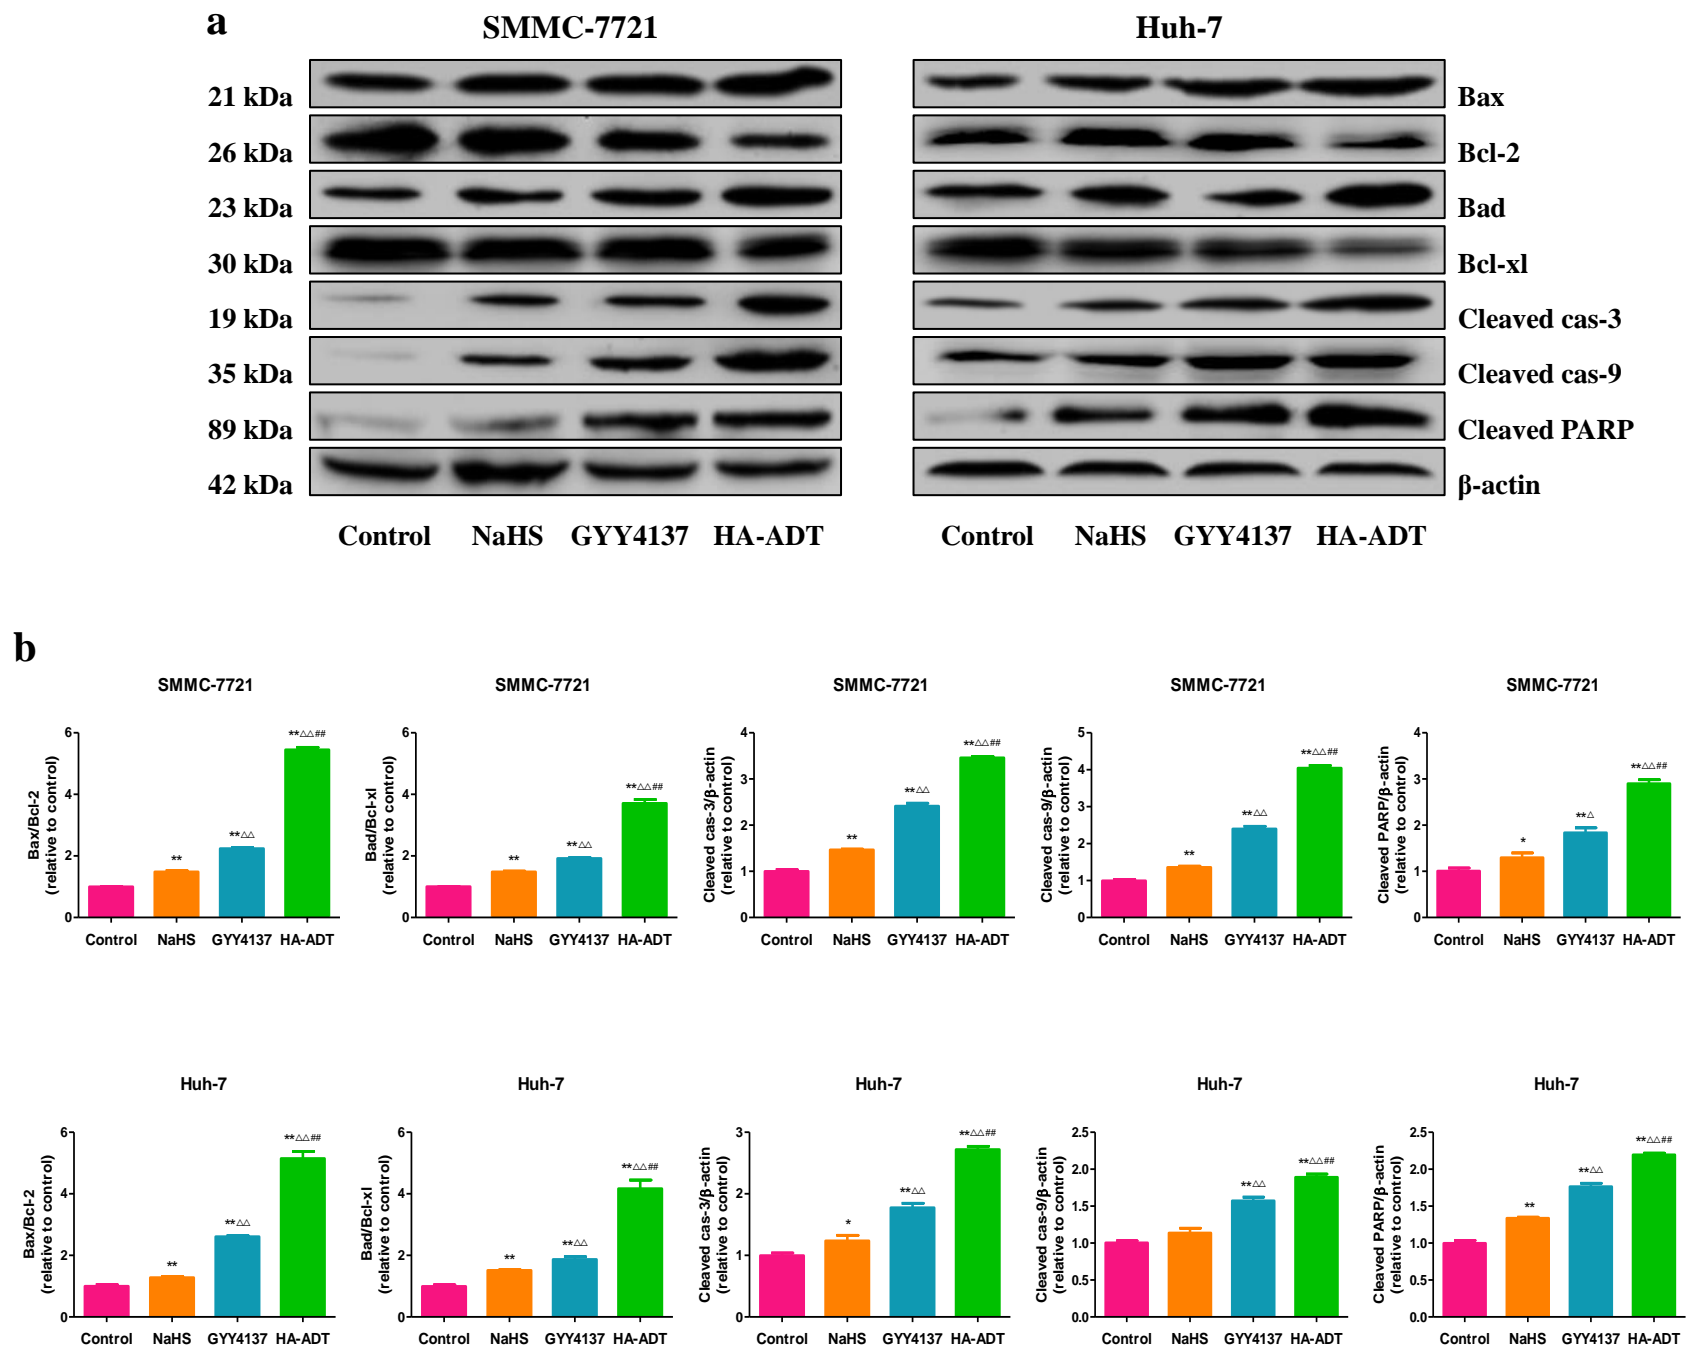

Supplement: f1 [file 8456852.f1.pdf]
